# Supplementary material for: On-site marine oil spillage monitoring probes formed by fixing oxygen sensors into hydrophobic/oleophilic porous materials for early-stage spotty pollution warning
Source: Royal Society of Chemistry journal article supplement (doi:10.1039/d1ra02931b), 2021-01-01
Supplement: d1ra02931b1.pdf [file d1ra02931b1.pdf]

## Electronic Supporting Information for

---

### **On site marine oil spillage monitoring probes formed from fixing oxygen sensor into hydrophobic/oleophilic porous materials for early stage spotty pollution warning**

*Shi Yuxin,<sup>a</sup> Yong Xu,<sup>b</sup> Zhijuan Sun, <sup>\*a</sup> Gang Wang,<sup>b</sup> Zhixiang Zeng,<sup>b</sup> Congjie Gao,<sup>a</sup> Qunji Xue<sup>b</sup> and  
Lixin Xue <sup>\*a</sup>*

<sup>a</sup> Center for Membrane Separation and Water Science & Technology, College of Chemical Engineering, Zhejiang University of Technology, Hangzhou, Zhejiang 310014, PR China.

E-mail: xuelx@zjut.edu.cn.

<sup>b</sup> Key Laboratory of Marine Materials and Related Technologies, Zhejiang Key Laboratory of Marine Materials and Protective Technologies, Ningbo Institute of Materials Technology and Engineering, Chinese Academy of Sciences, Ningbo, Zhejiang 315201, PR China.

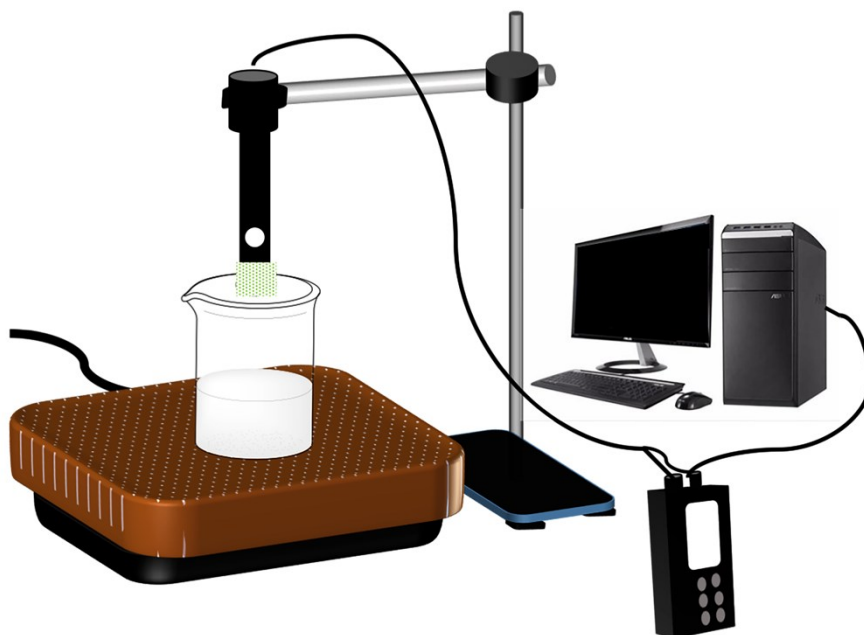

**Fig. S1** Oil spillage monitoring system based on oil oxygen detecting probe sealed in hydrophobic and oleophilic porous materials with paraffin film, schematic of the oil spillage online monitoring system.

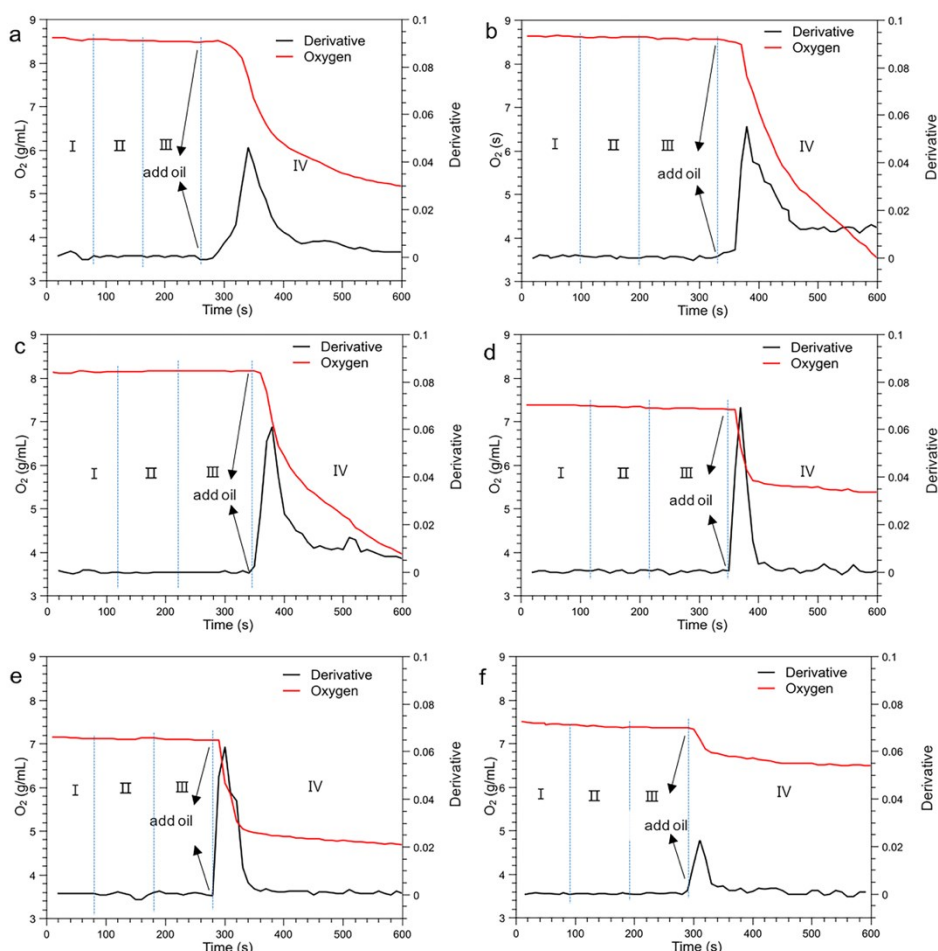

**Fig. S2** Signals monitored by the oxygen consumption sensor probe fixed with 2 layers of Material A for varied types of oil spillage (50 ml/0.8L) in simulated sea water: (a) lubricating oil ; (b) corn oil ; (c) soybean oil; (d) *n*-hexane; (e) petroleum ether; and (f) Toluene.

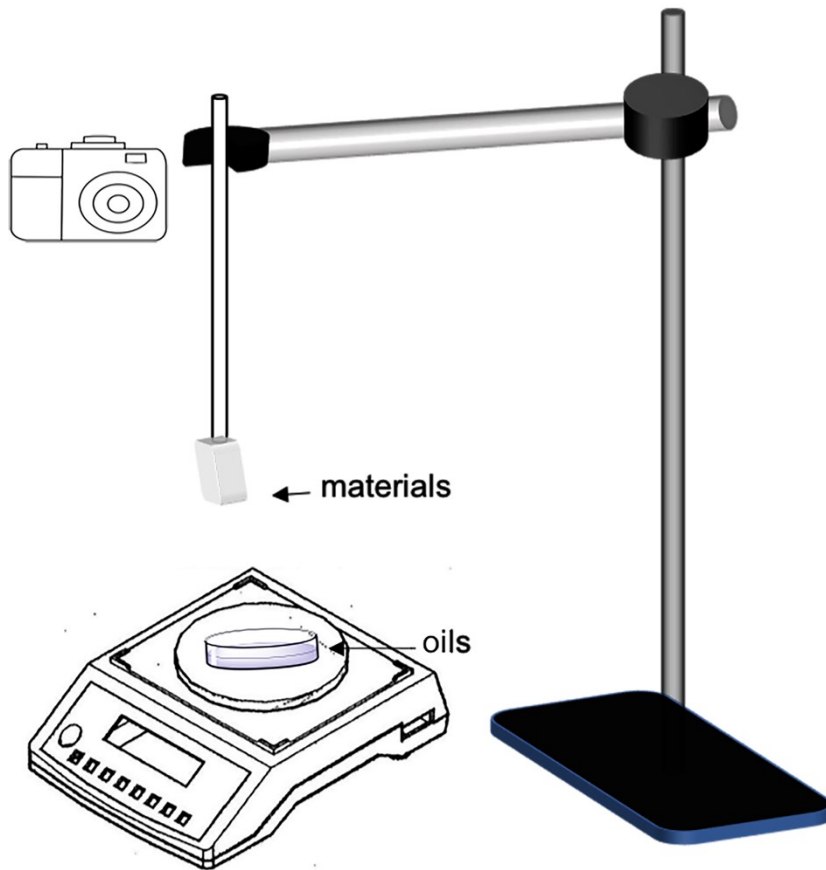

**Fig. S3** A schematic diagram to experimental setup to determine the dynamic oil absorbing speed of porous materials to spilled oils

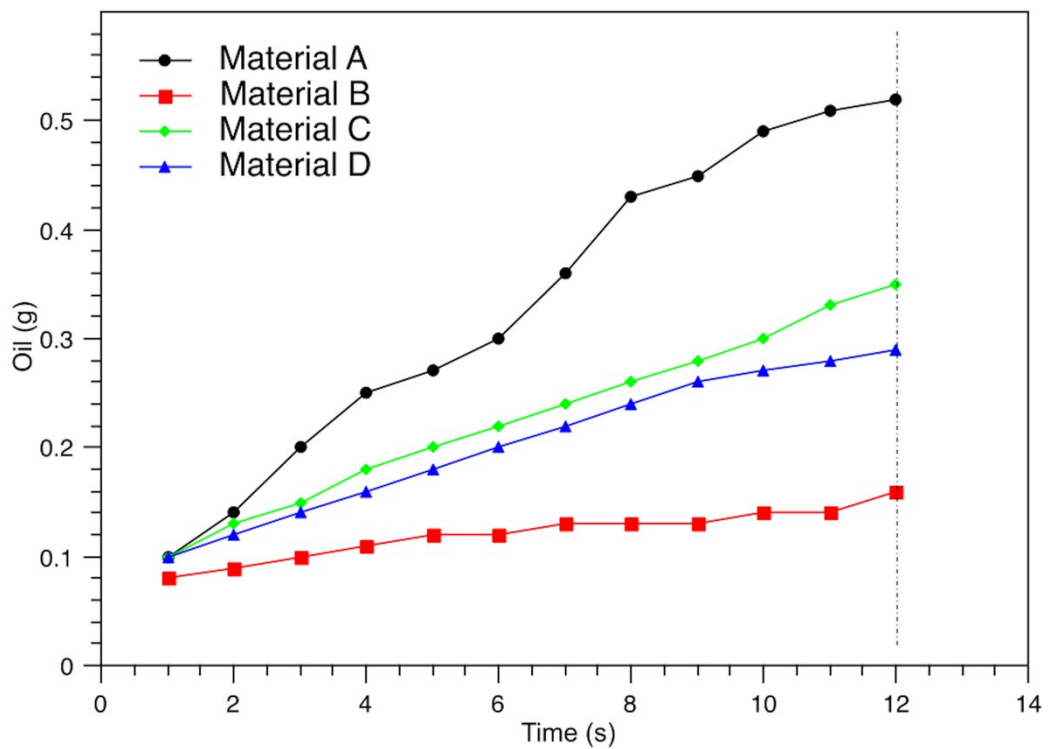

**Fig. S4** A schematic diagram to oil pollution adsorption curves of different materials

**Table S1** Impact of type of oil adsorbing porous materials on the parameters of the monitored signals during an on site 50 ml/0.8L (50 g/L) spillage of soybean oil.

| Materials | Peak height   | RSD (%) | Half width | RSD (%) | Peak area | RSD (%) |
|-----------|---------------|---------|------------|---------|-----------|---------|
| A         | 0.080±0.003   | 3       | 33±1       | 3       | 4.90±0.01 | 0.2     |
| B         | 0.020±0.002   | 10      | 56±3       | 6       | 2.2±0.2   | 10      |
| C         | 0.0080±0.0003 | 4       | 33±2       | 6       | 0.40±0.03 | 8       |
| D         | 0.0300±0.0008 | 3       | 77±5       | 6       | 2.1±0.2   | 8       |

**Table S2** Impact of thickness of oil Material A on the parameters of the monitored signals during an on site 50 ml/0.8L (50 g/L) spillage of soybean oil.

| Material A | Peak height | RSD (%) | Half width | RSD (%) | Peak area | RSD (%) |
|------------|-------------|---------|------------|---------|-----------|---------|
| 0          | 0.08±0.01   | 13      | 25±1       | 4       | 2.4±0.3   | 13      |
| 1          | 0.090±0.002 | 3       | 29±1       | 2       | 3.7±0.3   | 8       |
| 2          | 0.080±0.003 | 3       | 33±1       | 3       | 4.90±0.01 | 0.2     |
| 3          | 0.060±0.003 | 4       | 57±1       | 1       | 4.5±0.1   | 3       |

**Table S3** Repeatability and Reliable lower detection limit of the probe fixed with two layers of Material A for soybean oil spillage.

| SD/Oil(g/L)    | 1.0  | 1.5  | 2.0  | 3.0  | 5.0  | 12.5 | 25.0 | 50.0 | $3\delta_{1+2/\max}$ | Oil (g/L) |
|----------------|------|------|------|------|------|------|------|------|----------------------|-----------|
| $\delta_1$     | 0.02 | 0.01 | 0.02 | 0.04 | 0.03 | 0.04 | 0.04 | 0.02 |                      | —         |
| $\delta_2$     | 0.03 | 0.01 | 0.04 | 0.01 | 0.01 | 0.02 | 0.01 | 0.04 |                      | —         |
| $\delta_{1+2}$ | 0.05 | 0.02 | 0.06 | 0.05 | 0.04 | 0.06 | 0.05 | 0.06 | 0.18                 | 1.1       |

**Table S4** Repeatability and Reliable lower detection limit of the probe fixed with no Material A for soybean oil spillage. <sup>a</sup>

| SD/ Oil(g/L)     | 1.0  | 5.0  | 12.5 | 25   | 50   | $3\delta_{1+2/\max}^f$ | Oil (g/L) |
|------------------|------|------|------|------|------|------------------------|-----------|
| $\delta_1^b$     | 0.01 | 0.31 | 0.45 | 0.67 | 0.21 | —                      | —         |
| $\delta_2^c$     | 0.01 | 0.06 | 0.03 | 0.03 | 0.06 | —                      | —         |
| $\delta_{1+2}^d$ | 0.02 | 0.37 | 0.48 | 0.70 | 0.27 | 2.1                    | 36.5      |

<sup>a</sup> The reliable lower oil detection limit of the probe was figured out from corresponding curve between signal peak area and oil spillage amounts in Fig. 7.

<sup>b</sup>  $\delta_1$  is the standard deviation of signal peak areas obtained from repeated oil spillage experiments at varied spillage amounts.

<sup>c</sup>  $\delta_2$  is the standard deviations of the background signal peak areas without oil spillage.

<sup>d</sup>  $\delta_{1+2}$  is the sum of  $\delta_1$  and  $\delta_2$ .

$f3\delta_{1+2/\max}$  is three times the maximum of  $\delta_{1+2}$ . The reliable lower oil detection limit of the probe was figured out from corresponding curve between signal peak area and oil spillage amounts in Figure 7.

**Table S5** Impact of oil type on the parameters of signals from the oxygen consumption sensor probe fixed with 2-layer Material A in fresh water.

| Oils             | Peak height   | RSD (%) | Half width | RSD (%) | Peak area | RSD (%) |
|------------------|---------------|---------|------------|---------|-----------|---------|
| lubricating oil  | 0.040±0.002   | 5       | 47±1       | 2       | 2.2±0.1   | 5       |
| corn oil         | 0.063±0.002   | 3       | 30.8±0.3   | 0.9     | 3.1±0.1   | 3       |
| soybean oil      | 0.080±0.003   | 3       | 33±1       | 3       | 4.90±0.01 | 0.2     |
| <i>n</i> -Hexane | 0.060±0.001   | 2       | 27.8±0.5   | 2       | 1.70±0.01 | 0.6     |
| petroleum ether  | 0.0700±0.0003 | 0.4     | 26.7±0.1   | 0.4     | 2.10±0.02 | 1       |
| Toluene          | 0.020±0.001   | 5       | 27.5±0.4   | 1       | 0.70±0.01 | 1       |

**Table S6** Impact of vibration intensity on the signal parameters of oxygen consumption sensor probe fixed with 2 layers of Material A.

| vibration | Peak height | RSD (%) | Half width | RSD (%) | Peak area   | RSD (%) |
|-----------|-------------|---------|------------|---------|-------------|---------|
| 1         | 0.080±0.003 | 3       | 33±1       | 3       | 4.90±0.01   | 0.2     |
| 5         | 0.070±0.004 | 6       | 32±1       | 3       | 3.4±0.1     | 3       |
| 10        | 0.050±0.001 | 2       | 35±3       | 9       | 2.9±0.1     | 3       |
| 15        | 0.056±0.008 | 14      | 38±1       | 3       | 3.200±0.002 | 5       |
